1 ***Title: Cyclical environments drive variation in life history strategies: a general theory of***  
2 ***cyclical phenology***

3

4 ***Author: John S. Park***

5 *Author Affiliation:*

6 Committee on Evolutionary Biology

7 University of Chicago

8 1025 E. 57<sup>th</sup> Street

9 Culver Hall 402

10 Chicago, IL, 60637, USA

11

12

13 *Corresponding Author:*

14 John S. Park

15 1101 E. 57<sup>th</sup> Street

16 Zoology 400

17 Chicago, IL, 60637, USA

18 Phone: 203-435-7040

19 Email: johnspark@uchicago.edu

20 **ABSTRACT**

21 Cycles, such as seasons or tides, characterize many systems in nature. Overwhelming evidence  
22 shows that climate change-driven alterations to environmental cycles—such as longer seasons—  
23 are associated with phenological shifts around the world, suggesting a deep link between  
24 environmental cycles and life cycles. However, life history evolution in cyclical environments  
25 remains surprisingly not well understood. Here I build a general demographic framework and ask  
26 how life history strategies optimize fitness when the environment perturbs a structured  
27 population cyclically, and how strategies should change as cyclicity changes. I show that cycle  
28 periodicity alters optimality predictions of classic life history theory because repeated cycles  
29 have rippling selective consequences over time and generations. Notably, fitness landscapes that  
30 relate environmental cyclicity and life history optimality vary dramatically depending on which  
31 trade-offs govern a given species. The model tuned with known life history trade-offs in a marine  
32 intertidal copepod *T. californicus* successfully predicted life history variation across natural  
33 populations spanning a gradient of tidal periodicities. This framework shows how changes in  
34 environmental cycles can drive variation—without complex assumptions of individual responses  
35 to cues such as temperature—thus expanding the range of life history diversity explained by  
36 theory and providing a basis for adaptive phenology.

## 37 INTRODUCTION

38 Natural populations in all systems must survive environmental fluctuations. Biologists have long  
39 known that a particularly common and powerful mode of fluctuations in nature is cyclical, such  
40 as seasons. Species around the planet exhibit predictable and sensitive life history transitions that  
41 are tightly associated with seasonal cycles, also referred to as phenology. Environmental cycles  
42 in fact occur beyond just the timescale of seasons, such as daily, tidal, lunar, flood, fire and  
43 decadal oscillations, and life histories of species are often associated with cycles at these  
44 timescales as well [1–6]. Despite the ubiquity of cycles in nature, and clear empirical evidence of  
45 the importance of cycles for life histories, we lack a general theory of how life history evolution  
46 is shaped by cycles.

47 Over the last few decades perturbations to environmental cycles due to climate change  
48 have driven dramatic life history changes such as phenological timing in many species [7–15]. In  
49 fact, phenological shifts are widely regarded as the most conspicuous and rapid consequence of  
50 climate change across marine, freshwater, and terrestrial systems [14]. Notably, different species'  
51 phenologies are shifting in different directions, creating phenological mismatches with profound  
52 consequences on ecosystem function and health [7,11,16–19]. Disparate case studies of shifts  
53 that typically invoke individual-level responses to environmental cues such as temperature may  
54 be limited in their potential to explain general evolutionary forces due to system-specific  
55 idiosyncrasies. On the trailing edge of rapidly accumulating empirical evidence of shifts,  
56 questions regarding general mechanisms of life history evolution in cyclical environments have  
57 emerged to the forefront of theoretical population biology, biodiversity, and climate change  
58 science [20–22].

59           A first step in understanding the mechanics of life history evolution in cyclical  
60 environments may be to conceptualize cycles as sequential arrivals of harsh conditions whose  
61 periodicity is not reciprocally affected by local ecological dynamics. An example is the arrival of  
62 winter in seasonal systems. A typical consequence of such cyclical events for a population is  
63 heightened mortality as well as some perturbation to population structure (e.g. seedling mortality  
64 in plants [23]). This consequence not only reduces population size at a given time, but also  
65 impacts the long-term trajectory and fitness of the population [24,25]. It follows that, if periodic  
66 disturbance is an inherent feature of a habitat, fitness is determined by how well a resident  
67 population survives repeated demographic perturbations at regular intervals.

68           Population ecologists have long been interested in demographic dynamics in variable  
69 environments, including cyclically variable environments [22,26–31]. Life history theorists, on  
70 the other hand, have classically focused on how time-invariant (i.e. constant) perturbations on  
71 age-, size- or stage-classes of populations, mediated by trade-offs between biological processes,  
72 shape life history strategies broadly [32–36]. For example, theory predicts that heightened  
73 juvenile mortality should induce the evolution of reduced reproductive effort. Such predictions  
74 have been widely tested empirically, and effects are often strong, rapid, and heritable [37–42]. So  
75 far, modern models of life history evolution that do incorporate time-variance in the environment  
76 have mainly focused on how optimality predictions are altered by stochasticity (i.e. randomly  
77 variable environments), which yield convenient analytical probabilistic conclusions [22,31,43–  
78 45]. What is not well understood is how life histories are generally shaped by non-random cycles,  
79 despite biological attention to fundamentally cyclical environments such as seasonal systems  
80 [22], and the fact that parametric changes to cycles such as season length are repeatedly  
81 associated with life history changes across systems.

82           Here I explore the general relationship between periodicity of cycles and life history  
83 optimization. By taking a demographic life history theory approach I address the ultimate causal  
84 mechanism behind phenological traits and their shifts, given that phenology is fundamentally a  
85 study of how life cycle transitions are fit to environmental cycles and proximate causes of  
86 phenological expression, such as response to temperature cues, vary widely across systems [20].

87           I hypothesize that rates of life cycle transitions relative to cycle periodicity, balanced by  
88 trade-offs between current and future investments considering impending arrivals of predictable  
89 population perturbations, determine fitness. Thus I expect the period length of cycles to influence  
90 the consequences of trade-offs and shape evolutionary predictions of life history rates. I analyze  
91 these predictions by calculating which life history strategy in a population confers maximum  
92 fitness in a given periodic regime, and then studying how that optimal life history changes as  
93 periodicity changes. I explore how various trade-off assumptions impact these optimality curves  
94 to understand how different species in nature—whose life histories are in reality shaped by  
95 different sets of trade-offs—may be differentially affected by the same change in periodic regime.

96           Next I test my theoretical predictions in the copepod *Tigriopus californicus* (Copepoda:  
97 Harpacticoida), a crustacean found in rock pools in the supralittoral (upper tidal) zone along the  
98 North American Pacific coast. Populations are disturbed periodically by wave-wash at high tide,  
99 and experience population decline and heightened juvenile mortality periodically. Periodicity of  
100 disturbance varies among populations depending on regional tidal patterns and pool height on the  
101 shore. *T. californicus* provides an ideal system to study life history variation in cyclical systems  
102 across populations due to its short generation time and short disturbance cycles, the rare  
103 opportunity to sample from homogenized whole populations, and ease of quick sampling and  
104 trait measurements yielding large amounts of within- and across-population data. Across 19

105 natural populations of *T. californicus* in two regions of northern Washington I ask: do  
 106 disturbance cycle periodicity and known trade-offs together predict life history variation across  
 107 populations?

108

## 109 METHODS

### 110 Model construction.

111 I consider continuous-time dynamics of a stage-structured population and impose stage-specific  
 112 mortalities at given periodicities (full model description in Supporting Information, section 1).

113 First, I describe a population in two stages of broad relevance: juveniles and reproducing adults.

114 I express dynamics in abundances of the two stages as a system of ordinary differential equations

115  $dJ/dt = -(\mu+d)J + fA$  and  $dA/dt = \mu J - \gamma A$ , that can be expressed as matrix  $\mathbf{M}$ :

$$\mathbf{M} = \begin{bmatrix} -(\mu + d) & f \\ \mu & -\gamma \end{bmatrix} \quad (1)$$

116 where  $J$  is juveniles,  $A$  is adults,  $\mu$  is the rate at which juveniles mature into reproducing adults,  $d$

117 is background mortality of juveniles,  $f$  is the reproductive rate of adults, and  $\gamma$  is background

118 mortality of adults. Then, via eigendecomposition of  $\mathbf{M}$ , I express the solution at time  $t$  as:

$$\begin{aligned} J(t) &= \frac{A(0)v_{(2)1} - J(0)v_{(2)2}}{v_{(2)1}v_{(1)2} - v_{(2)2}v_{(1)1}} v_{(1)1} e^{\lambda_1 t} + \frac{J(0)v_{(1)2} - A(0)v_{(1)1}}{v_{(2)1}v_{(1)2} - v_{(2)2}v_{(1)1}} v_{(2)1} e^{\lambda_2 t} \\ A(t) &= \frac{A(0)v_{(2)1} - J(0)v_{(2)2}}{v_{(2)1}v_{(1)2} - v_{(2)2}v_{(1)1}} v_{(1)2} e^{\lambda_1 t} + \frac{J(0)v_{(1)2} - A(0)v_{(1)1}}{v_{(2)1}v_{(1)2} - v_{(2)2}v_{(1)1}} v_{(2)2} e^{\lambda_2 t} \end{aligned} \quad (2)$$

119 where  $v_{(i)j}$  is the  $j^{\text{th}}$  element of the  $i^{\text{th}}$  eigenvector corresponding to eigenvalue  $\lambda_i$  of  $\mathbf{M}$ . This

120 solution describes simple structured population dynamics in an undisturbed environment, but by

121 eigendecomposing the system I isolate  $t$  which will eventually allow me to study demographic

122 dynamics as a direct function of period length between disturbances. To make the solutions

123 explicit with respect to period T, I let  $t = T$ , and at time T multiply the structure by  $S_J$  and  $S_A$   
 124 which correspond to juvenile- and adult-specific survival associated with disturbance. The  
 125 combined system can be expressed as the matrix  $\mathbf{P}$  (S10):

$$\mathbf{P} = \begin{bmatrix} S_J \frac{[(\mathbf{v}_{(1)2} e^{\lambda_2 T} \mathbf{v}_{(1)2} - \mathbf{v}_{(1)1} e^{\lambda_1 T} \mathbf{v}_{(2)2})]}{\mathbf{v}_{(2)1} \mathbf{v}_{(1)2} - \mathbf{v}_{(2)2} \mathbf{v}_{(1)1}} & S_J \frac{[(\mathbf{v}_{(1)1} e^{\lambda_1 T} \mathbf{v}_{(2)1} - \mathbf{v}_{(1)2} e^{\lambda_2 T} \mathbf{v}_{(1)1})]}{\mathbf{v}_{(2)1} \mathbf{v}_{(1)2} - \mathbf{v}_{(2)2} \mathbf{v}_{(1)1}} \\ S_A \frac{[(\mathbf{v}_{(2)2} e^{\lambda_2 T} \mathbf{v}_{(1)2} - \mathbf{v}_{(1)2} e^{\lambda_1 T} \mathbf{v}_{(2)2})]}{\mathbf{v}_{(2)1} \mathbf{v}_{(1)2} - \mathbf{v}_{(2)2} \mathbf{v}_{(1)1}} & S_A \frac{[(\mathbf{v}_{(1)2} e^{\lambda_1 T} \mathbf{v}_{(2)1} - \mathbf{v}_{(2)2} e^{\lambda_2 T} \mathbf{v}_{(1)1})]}{\mathbf{v}_{(2)1} \mathbf{v}_{(1)2} - \mathbf{v}_{(2)2} \mathbf{v}_{(1)1}} \end{bmatrix} \quad (3)$$

126 Matrix-multiplying initial abundances by  $\mathbf{P}$  would thus give stage structure after existing in a  
 127 constant environment for time T and experiencing a disturbance event that incurs stage-specific  
 128 mortalities. More interestingly, I use this framework to ask: what are the consequences of  
 129 different combinations of life history traits on the fitness of a population given that it resides in  
 130 disturbance regime T?

131

### 132 **Fitness.**

133 The dominant eigenvalue ( $\lambda$ ) of a population transition matrix is a widely used measure of  
 134 relative fitness because it represents how well the population will perform in the long run  
 135 compared to other hypothetical populations with different life history strategies [25,36]. This  
 136 metric, equivalent to ‘ $r$ ’ in demography and life history theory, does not capture consequences of  
 137 short-term transient dynamics [46,47], but has been useful for drawing broad life history  
 138 evolution predictions and conceptualizing relative fitness that match well with empirical  
 139 observations [24,25,36]. In stochastic environments fluctuations in instantaneous growth rates  
 140 may lead  $\lambda$  to give inaccurate evolutionary predictions. In systems that can be modelled by  
 141 periodic switching between environments, however, eigenvalues and eigenvectors of the matrix  
 142 product of constituent matrices describing the different environmental states can be used for  
 143 demographic and life history analyses in exactly the same way as they are used in time-invariant

144 theory [25,48]. My matrix  $\mathbf{P}$  is equivalent to periodic models since the system switches between  
145 an undisturbed phase and disturbance, and the switching periodicity and population matrix  
146 elements do not fluctuate randomly (see Supporting Information, section 3, Fig. S1 for  
147 simulation results). Thus, here I use the dominant eigenvalue of  $\mathbf{P}$  (hereafter referred to as  $\lambda_P$ ) as  
148 the measure of relative fitness to compare the theoretical performance of life history strategies in  
149 a periodically time-variant framework, and characterize general selective pressures on life  
150 history strategies as a function of cycle periodicity.

151

### 152 **Life history trade-offs.**

153 Life history evolution is a matter of optimization because limited resources must be allocated  
154 into various biological processes involving trade-offs [36,49]. The exact shapes of trade-off  
155 functions in organisms are famously difficult to measure, let alone justify in model assumptions  
156 [49,50]. Here I take a conservative approach and assume simple linear trade-offs to investigate  
157 general patterns in optimality as a function of the environment without making more complex  
158 physiological assumptions. To express a trade-off between any two traits in the construction of a  
159 fitness landscape, I computationally set the vector of the range of values of one trait in  
160 decreasing order as the other increases, imposing a negative slope between the two traits. When  
161 two traits do not trade off, one of the traits remains at the mean of its range as the other varies  
162 through its own range. I varied the combinatory inclusions of trade-offs among the four key  
163 parameters to create model variants and investigate their relative fit to the data.

164

### 165 **Fitness landscapes and optimal life history strategies.**



166 All realizations of  $\mathbf{P}$ —and thus the construction of fitness landscapes—must be constrained  
167 within the space of the interacting life history parameters,  $\mu$ ,  $d$ ,  $f$ , and  $\gamma$ . In this presentation I  
168 constrained the space with known *T. californicus* life history ranges and trade-offs to  
169 demonstrate one example of the usage of this framework, but constraints can be set flexibly to  
170 represent any given species (see Supporting Information, section 2.5 for descriptions and  
171 citations for parameterization).

172 Using  $\lambda_P$  I construct fitness landscapes for  $\mu$  and  $f$  simultaneously for each model. Here I  
173 focus on  $\mu$  and  $f$  because they are life history traits for which I can collect large amounts of  
174 paired data in *T. californicus*, but it should be noted that fitness landscapes can be created for any  
175 life history trait in the original system of differential equations. For each landscape, I scan across  
176 the range of  $\mu$  or  $f$  for a given value of T, while varying all other traits according to trade-off  
177 relationships included in the given model. Therefore I construct a vertical gradient of relative  $\lambda_P$   
178 per T. To construct a landscape, I calculate gradients of relative  $\lambda_P$  across the horizontal axis of T.  
179 The optimal trait per T is the trait that maximizes  $\lambda_P$  per T. Finally, to get the curve of optimal  
180 trait values across the axis of T I track values associated with maximum  $\lambda_P$  across T.

181

### 182 **Empirical investigation in *Tigriopus californicus*.**

183 *Tigriopus californicus* is a copepod found widely along the North American Pacific coast (see  
184 Supporting Information, section 2.1 for detailed description of natural history). Dense  
185 populations reside in rock pools above the intertidal zone at varying heights [51–53], which  
186 accordingly experience tide cycle disturbance at varying periodicities. When tide levels  
187 cyclically reach pool heights and waves wash through pools, *T. californicus* cling onto the rocky  
188 benthos in order to prevent being flushed down to open water or to the lower intertidal zone [53].

189 If they are washed down, predators that do not occur in *T. californicus* pools feed on them  
190 quickly, and re-colonization of *T. californicus* into the pools appear to be low [53,54]. Despite  
191 clinging, tidal disturbance was shown to always decrease population size, and in particular, incur  
192 heightened juvenile mortality (Supporting Information, section 3, Fig. S3).

193 I sampled 19 isolated populations across two sites in northern Washington, USA (Neah  
194 Bay, Friday Harbor) in order to capture a wide gradient of disturbance periodicities (see  
195 Supporting Information, sections 2.2-2.4 for detailed description of data collection). I quantified  
196 the periodicity of tidal disturbance in each pool via timeseries analysis of pool temperature data  
197 over 4 months at 5-minute intervals, taking abnormal drops in temperature as signals of wave  
198 flush (see Supporting Information, section 2.2). I siphoned entire isolated populations out of rock  
199 pools, and subsampled individuals after homogenizing them, to get representative population  
200 samples. I reared 30 mating pairs captured from each population in common garden settings. In  
201 these lines I measured rate of maturity ( $\mu$  in the model) and rate of reproduction ( $f$  in the model)  
202 (see Supporting Information, section 2.4 for detailed description of trait measurements).

203

#### 204 **Likelihood and model fitting.**

205 I calculated the log-likelihoods of the optimality curves of the two focal life history traits  $\mu$  and  $f$   
206 produced by each model variant given the variance and covariance of the  $\mu$  and  $f$  data. Each  
207 model is a different trade-off model (Supporting Information, Fig. S2, Table S2). Every model  
208 has the same number of estimated parameters because they only differ in how the parameters  
209 trade off in the construction of the fitness landscapes, which is included computationally by  
210 aligning parameter range sequences in reverse order. Therefore model selection criteria that  
211 penalize number of parameters such as AIC were not used. Each model produces optimality

212 curves of  $\mu$  and  $f$  (dominant eigenvalue of matrix  $\mathbf{P}$ ) given trade-off relationships, across values  
213 of disturbance period ( $T$ ). I searched for the maximum log-likelihood of each model given  $\mu$  and  
214  $f$  data simultaneously within the space of  $S_A \geq S_J$  and compared maximum log-likelihoods of the  
215 13 model variants.

216

## 217 **RESULTS**

### 218 **Cycle periodicity alters optimal life history predictions.**

219 Classic life history theory balances costs and benefits of key biological investments such as  
220 development, reproduction, and survival to predict fitness profiles of life history traits [36,55,56].  
221 Here I incorporated these classic balance considerations but imposed cyclical perturbations to  
222 population structure and asked if the evolutionary consequences of the balances change as a  
223 function of cycle periodicity. Using this framework, I analyzed the role of cost (slope of trade-off,  
224 Fig. 1A) on the fitness profile of a life history trait (maturation rate) in two scenarios: one in  
225 which period length is long enough (e.g. to fit more than 10 generations in a period) that the  
226 effect of discrete cycles on the evolution of life history rates should be small (Fig. 1B), and  
227 another in which period length is at a relevant timescale to generation time (Fig. 1C). The former  
228 approaches classic formulations of optimal life history predictions based on trade-offs alone [55].  
229 The latter shows that external periodic perturbations significantly change optimality predictions.  
230 In the latter scenario all trade-off cost assumptions predict higher optimal values of maturation  
231 rate compared to the former. The spread of fitness profiles is also larger in the latter scenario,  
232 which may suggest weaker selection or higher variability of maturation rate within a population.  
233 Lastly, and most interestingly, the relationship between trade-off cost and optimality is exactly  
234 reversed between the two scenarios: the lowest cost case produces the lowest optimal maturation  
235 rate under long periods but the highest optimum under short periods, and vice versa. These

236 results show that cyclical perturbations significantly alter classic predictions of optimal life  
237 history that are solely based on trade-offs.

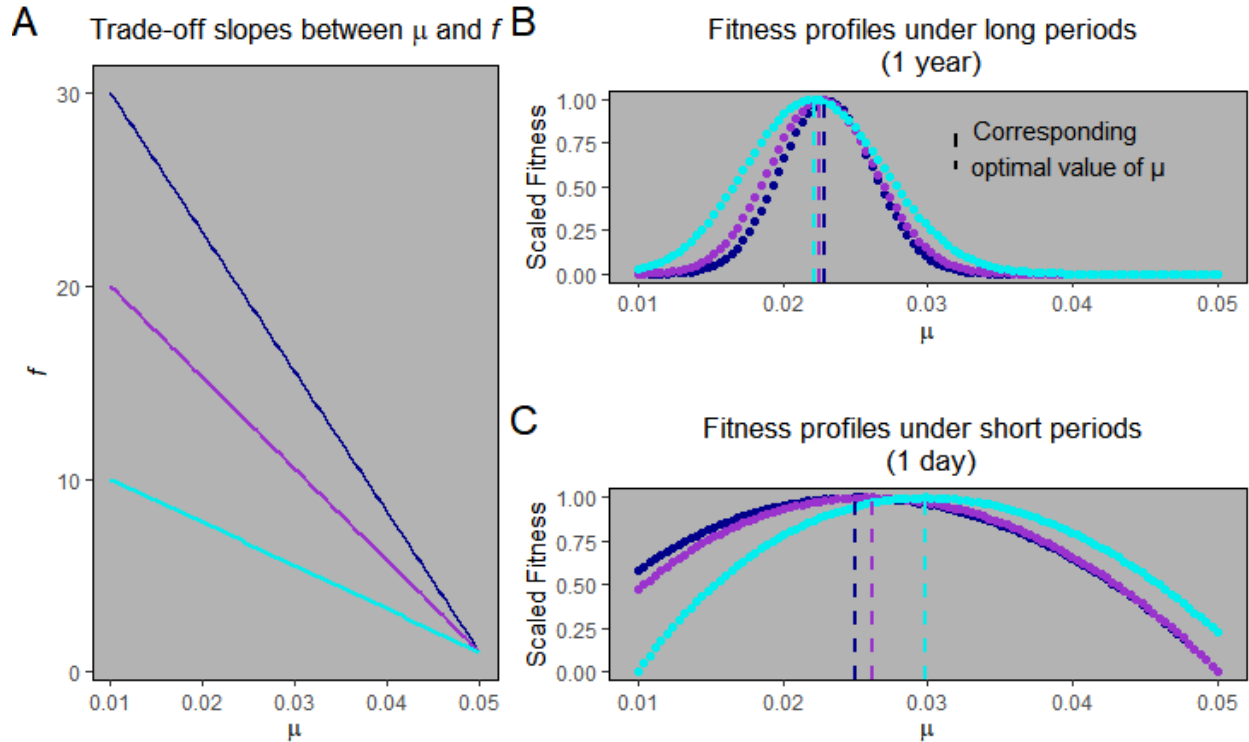

238

239 **Figure 1.** Three hypothetical cost functions between  $\mu$ —rate at which juveniles mature into reproducing  
240 adults—and  $f$ —adult fecundity—are analyzed while keeping linear trade-offs between  $\mu$  and  $f$  with their  
241 respective stage-specific background survival rates ( $d$  and  $\gamma$ ) constant. Colors of cost functions (A)  
242 correspond to colors of fitness profiles of  $\mu$  in (B) and (C). Dashed lines in (B) and (C) show peaks of  
243 fitness profiles which correspond to optimal values of  $\mu$ . Periodicity of cyclical perturbation to population  
244 structure is set to be much greater than generation time in (B), and at a relevant time scale ( $<$ generation  
245 time) in (C). Under short periods (C), all cost functions produce higher optimal  $\mu$  values, wider fitness  
246 profiles, and an exactly reversed relationship between cost and optimality compared to long periods (B).

247

248 **Periodicity and trade-offs interact to produce diverse life histories.**

249 Optimal life history varies nonlinearly as a function of disturbance cycle period, even with

250 assumptions of simple linear trade-offs between traits (Fig. 2). For example, with stage-

251 structured mortality under disturbance and trade-offs between maturation and background adult  
252 survival, predicted maturation and fecundity increase rapidly with increasing periodicity at low  
253 periods, but change little at high periods (Supporting Information, section 3, Fig. S2C).

254 Shapes of optimality curves (optimal life history vs. period) can vary dramatically  
255 depending on which trade-offs are included. For example, maturation rate and fecundity are  
256 expected to evolve in opposite ways as periodicity changes when maturation rate trades off with  
257 background juvenile survival and fecundity (Supporting Information, section 3, Fig. S2G)  
258 compared to when maturation rate trades off with fecundity and background adult survival  
259 (Supporting Information, section 3, Fig. S2I). Similarly, maturation rate and fecundity increase  
260 together under maturation-background adult survival trade-off (Supporting Information, section  
261 3, Fig. S2C), but decline together under background juvenile-adult survival trade-off (Supporting  
262 Information, section 3, Fig. S2E) or fecundity-background adult survival trade-off (Supporting  
263 Information, section 3, Fig. S2F), and are insensitive to environmental cycle change under  
264 maturation-background juvenile survival trade-off (Supporting Information, section 3, Fig. S2A).  
265 In the next section I show that the model that includes known trade-offs in *T. californicus* has the  
266 highest likelihood given *T. californicus*-specific life history data; but it is important to note that  
267 no one model is necessarily better than another in a general sense because different species in  
268 nature will have different levels of complexity and rank order of trade-offs between life history  
269 traits [55,49,57].

270 Overall, these results support the hypothesis that, beyond the long-accepted  
271 understanding that the mean and variance of population structure perturbations shape life history  
272 variation [24,34,35,39], periodicity of such perturbations plays an important role in life history  
273 variation.

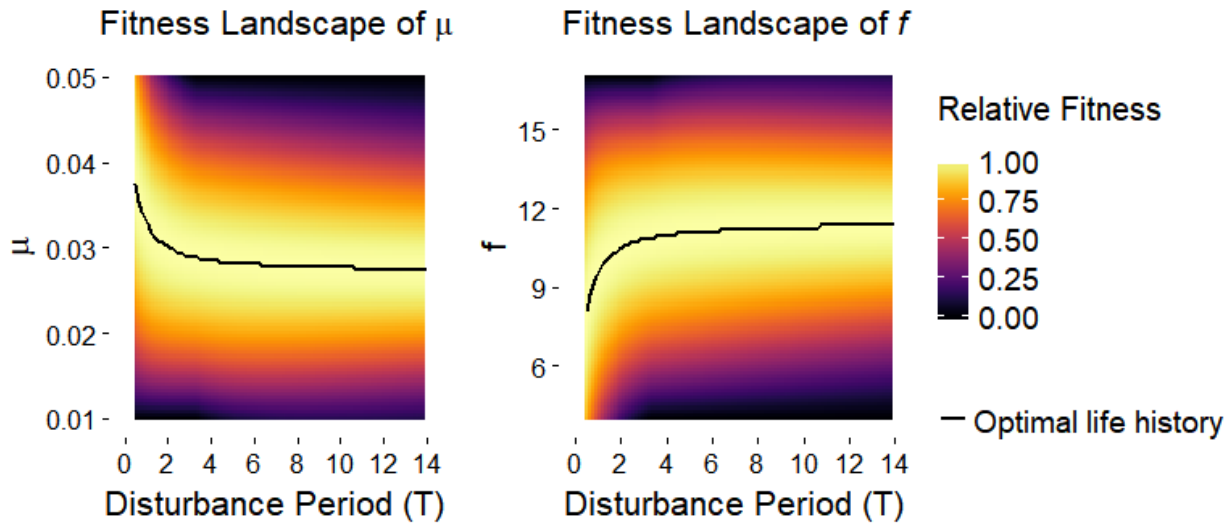

274

275 **Figure 2.** Example fitness landscapes of two focal life history traits,  $\mu$  (rate of maturity) and  $f$   
276 (reproductive rate) which assumes lower juvenile survival with each disturbance event ( $S_A = 0.9$ ,  $S_J =$   
277  $0.6$ ), and trade-offs between  $\mu$  and  $f$ , between  $\mu$  and  $d$ , and between  $f$  and  $\gamma$ . Heat shows normalized  
278 fitness of a life history strategy compared to all other strategies in a disturbance regime ( $T$ ). Curves track  
279 the optimal (maximum fitness) life history trait across  $T$ .

280

### 281 ***Tigriopus* trade-offs predict life history variation across a periodicity gradient.**

282 Temperature time series analyses confirmed that there is a broad range of disturbance cycle  
283 periodicities across *T. californicus* pools across the two regions (Supporting Information, section  
284 2.1; section 3, Fig. S3A, B; section 4, Table S1). These sampled pools provided a gradient of  
285 periodic regimes against which I tested optimal life history predictions. Daily temperature  
286 regimes, which may contribute to life history differences [58,59], were not significantly different  
287 among pools of varying periodicity regimes across the two regions (Supporting Information,  
288 section 3, Fig. S4). Disturbance always caused higher juvenile mortality than adult mortality in  
289 subsampled disturbance events, with mean juvenile mortality of 41% and mean adult mortality of  
290 6% (Supporting Information, section 3, Fig. S3C).

291

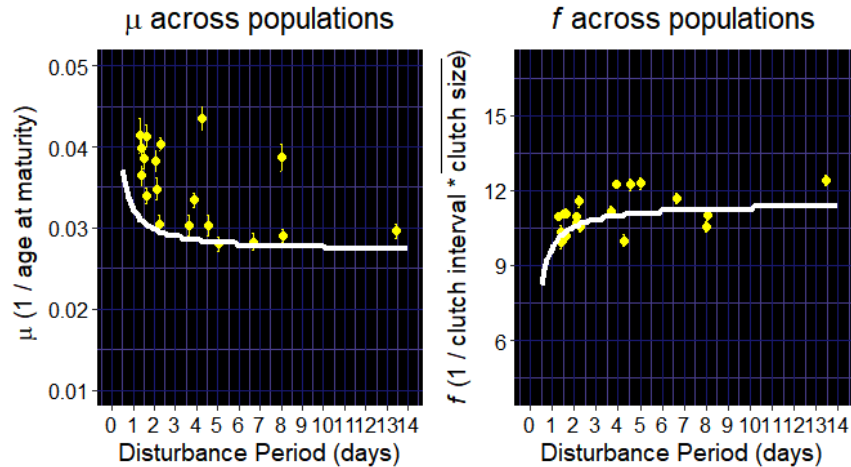

292

293 **Figure 3.** Mean ( $\pm$ se) values of the two focal life history traits  $\mu$  and  $f$  across 19 *T. californicus*  
294 populations, against mean disturbance period determined by timeseries analysis of wave disturbance  
295 signals in each pool. Curves are optimal life history functions across periodicity ( $T$ ) fit simultaneously to  
296  $\mu$  and  $f$ .

297

298 Life history traits shift as disturbance period changes across *T. californicus* populations  
299 (Fig. 3), following model predictions (Fig. 2). The best model (likelihood maximizing when  $\mu$   
300 and  $f$  are fit simultaneously) was the one that assumed trade-offs between maturation rate and  
301 fecundity, between maturation and juvenile survival, and between fecundity and adult survival  
302 (Table 1), consistent with known trade-offs in *T. californicus* (Supporting Information, section  
303 2.1). While the fit of the model to the data does not elucidate the selective strength of cyclical  
304 disturbance on life histories, the statistical support demonstrates that the hypothesis based on  
305 optimization in cyclical environments is consistent with the data and cannot at this time be  
306 rejected. Finally, model variants with double or tertiary trade-off assumptions generally fit better  
307 than ones with only single trade-offs (Supporting Information, section 3, Fig. S2; section 4,  
308 Table S2). These comparisons among model variants suggest that multidimensional trade-off  
309 relationships—which are typically avoided in empirical measurements or model assumptions of  
310 life history evolution [49,50], but gaining some attention [60,61]—may actually be important in

311 predicting life history optimization in cyclical environments because trade-off consequences  
 312 change as a function of cycle period.

313

314 **Table 1. Rank-ordered top five model variants with their life history trade-off assumptions**

| Model (Trade-off)                                                | Log-likelihood |
|------------------------------------------------------------------|----------------|
| $d \leftrightarrow \mu \leftrightarrow f \leftrightarrow \gamma$ | <b>441.771</b> |
| $\mu \leftrightarrow f \leftrightarrow \gamma$                   | 441.709        |
| $d \leftrightarrow \mu \leftrightarrow f$                        | 441.527        |
| $d \leftrightarrow f \leftrightarrow \gamma$                     | 441.120        |
| $\mu \leftrightarrow f$                                          | 431.774        |

315

316 *Arrows denote trade-offs between life history traits. Model variants have different trade-off inclusions,*  
 317 *but have the same number of estimated parameters because linear trade-offs were included*  
 318 *computationally by setting parameter ranges of those traits in opposing (increasing vs. decreasing) order.*  
 319 *Therefore model comparison criteria that penalize number of parameters were not needed. Likelihoods*  
 320 *are based on simultaneous fitting of  $\mu$  and  $f$ . See Supporting Information, section 4, Table S2 for the full*  
 321 *list of models.*

322

## 323 **DISCUSSION**

324 Ecologists have long assumed that environmental cycles are important for life cycle-  
 325 related traits. But growing knowledge of phenological shifts have generated confusion regarding  
 326 how environmental cycles shape life history strategies and thus transition rates of life cycle  
 327 phases. Various species in the same community undergoing the same change in seasonal cycles  
 328 often exhibit phenological shifts in opposite directions, suggesting an interaction between  
 329 external cycles and internal mechanisms of life history optimization. My framework addresses  
 330 how the consequence of trade-offs, a fundamental driver of life history evolution, is influenced  
 331 by cycles. Results show that environmental cycles can significantly alter traditional predictions  
 332 of life history evolution that are based on assumptions of population structure perturbations and  
 333 trade-offs alone. A version of the model tuned with known *T. californicus* trade-offs successfully



334 predicted the shape of life history variation across natural periodicity regimes, demonstrating the  
335 power of this mechanistic framework.

336 Varying trends in phenological shifts among species in fact offer current, global  
337 examples of the creation of life history variation. They provide a hidden opportunity to address a  
338 fundamental puzzle in ecology and evolution: why are life histories diverse in nature? Here I  
339 show that the interaction between environmental cycles and life history trade-offs is a simple  
340 mechanism that can account for large variations in life histories. First, due to the non-linear  
341 relationships between cycle period and optimal traits, the same magnitude of period change can  
342 induce different magnitudes of life history evolution between two populations of a species that  
343 are in different cyclical regimes (Fig. 2). Second, different trade-offs produce varying shapes of  
344 optimality curves (Supporting Information, section 3, Fig. S2), and thus the same change in  
345 period can induce an increase, decrease, or no change in a life history trait for different species in  
346 the same system depending on what trade-offs are biologically important for those species.  
347 Environmental cycle periodicity is diverse across systems (such as growing season lengths across  
348 a latitudinal gradient), and trade-off architectures among populations and species vary widely  
349 due to physiological constraints, environmental conditions, and reaction norms [49]. Combined,  
350 cycles and trade-offs can produce a wide array of predicted life history strategies. Testing this  
351 mechanism in species that are controlled by different trade-offs, either across populations in  
352 different cyclical regimes or within a single population through time in a habitat undergoing a  
353 change in cycle periodicity—for instance due to climate change—will provide fruitful avenues  
354 for further exploring this perspective.

355

356 **Stochasticity, ESS models, and gene flow.**

357 Cycles in nature, of course, are not perfectly periodic. The present study focuses on the  
358 consideration of period, or interval length between autocorrelated events. The mechanistic  
359 influence of fundamentally cyclical environments on life history evolution is noticeably  
360 understudied compared to probabilistic expectations in stochastic environments [22], even  
361 though regular cycles on various time scales are common in nature. Periodic models can be used  
362 to address a real aspect of nature that is difficult or impossible to address explicitly with  
363 stochastic models: cyclicity. Here, I take advantage of the fact that periodic models allow the  
364 use of matrix properties such as the dominant eigenvalue to infer relative fitness within a  
365 fluctuating system [25,48] and analyze conditions for optimization. By doing so I uncover a  
366 novel mechanistic relationship between cyclicity and life history evolution. However,  
367 cyclicity and stochasticity are both important aspects of nature. For instance, stochastic  
368 fluctuations in instantaneous population growth rate can significantly modify evolutionary  
369 trajectories predicted by time-invariant or periodic theoretical assumptions [46,47,62]. Studying  
370 the relative influences of periodicity and stochasticity on optimal strategy, and on how quickly a  
371 population evolves to its predicted optimal strategy, are the obvious next steps that will add more  
372 richness to the perspective offered here.

373         Optimality curves in my model framework are attractors that represent evolutionary  
374 stable strategies (ESS) because I take the long-run growth rate of populations (dominant  
375 eigenvalue of  $\mathbf{P}$ ) as the measure of fitness as is commonly done in demography and life history  
376 theory. ESS models are useful for the purpose of predicting general directions of selection over a  
377 long term. ESS models take a non-genetic perspective on broad selective forces, although a  
378 genetical justification for optimization of a quantitative trait is given by the fact that a mutation  
379 can invade the population if it confers a higher  $r$  on its carriers [24]. Optimization models and

380 quantitative genetics models are approximately equal for constrained multivariate systems [63].  
381 In *T. californicus*, selection on optimal life histories may be obscured if high gene flow among  
382 nearby populations exists due to wave transport. However, colonization rates and genetic  
383 exchange have been repeatedly observed to be low in this system [64–66], and demographic  
384 dynamics given high mortality rates caused by tidal disturbance likely out-scale population  
385 genetic dynamics on the time scale of tide cycles. In this study I deliberately chose populations  
386 that were deemed to be well isolated given field observations. But the level of gene flow may  
387 vary depending on locality due to habitat characteristics, and may contribute to some of the  
388 variance within populations and deviations of population means from ESS predictions.  
389 Nonetheless, my model fitting results suggest that ESS assumptions predict *T. californicus* life  
390 histories reasonably well given a population's periodic regime.

391

#### 392 **Trade-off functions.**

393 Trade-offs between traits can be nonlinear, and multidimensional architectures of trade-offs can  
394 be extremely difficult to measure [49,57,50]. Here I have taken the conservative approach of  
395 assuming linear trade-offs among modeled life history variables to focus on the demonstration  
396 that consequent optimality curves across periodicity are nonlinear, and that a diverse set of  
397 optimality curves can be produced with different trade-offs. The simple linear assumption still  
398 performs well, at least with *T. californicus* life history data from my sample populations.  
399 However to test this framework further in different species, different functions can and should be  
400 used if the relationship between two traits is known to be nonlinear.

401

#### 402 **Links to evolution of seasonal phenologies.**

403 In seasonal environments cyclical arrival of harsh meteorological conditions (e.g. winter) can  
404 incur large demographic perturbations and thus strongly influence population dynamics [67,68].  
405 Here I show that if periodic arrivals of disturbance incur significant demographic perturbations,  
406 the costs of having non-optimal life history strategies ripple across generations and cycle periods;  
407 thus, cyclical perturbations play an important role in driving the evolution of life history  
408 transition rates.

409         Period is not the only parameter of cycles, however. Particularly for seasons, cycle  
410 amplitude may also shape phenologies in important ways, and is shifting with climate change in  
411 many natural systems (e.g. seasonal CO<sub>2</sub> cycle amplitude [69,70]). Amplitude of seasonal cycles  
412 may play two roles for evolution. First, amplitude is associated with intensity of disturbance,  
413 which can be explored with survivorship functions in my theoretical framework. If the pattern of  
414 stage-specific mortality associated with cyclical disturbance is clear, such as in *T. californicus*  
415 and many seasonal species, then heightened intensity of cyclical disturbance will likely increase  
416 strength of selection. Second, amplitude reflects the rate of environmental change within cycle  
417 phases. Rate of change may be important for cue-detection and plastic responses. For example  
418 many plants in seasonal environments are well known for tracking growing degree-days as a way  
419 of taking cues on the passing of the seasons [71]. In my theoretical framework, cyclical  
420 disturbances arrive without warning and simply incur repeated penalties on individuals and  
421 cohorts that had non-optimal life history strategies for the given regime. In reality there may be a  
422 number of continuously changing environmental variables in *T. californicus* pools such as  
423 salinity, and I cannot exclude the possibility that, like plants, birds, or many aquatic invertebrates,  
424 *T. californicus* possess biological mechanisms to use cues from continuously changing  
425 parameters to plastically alter their phenotypes. Nonetheless, it is notable that a simple

426 framework that does not include the possibility of plastic responses predicts variation in life  
427 histories as a function of periodicity, in what are likely continuously changing habitats. Future  
428 phenological work should consider the relative roles of demographic influences such as those  
429 discussed here and plastic response to cues that can be tracked along continuous cycles.

430         When considering phenological evolution in cyclical environments, the relative scaling of  
431 life cycles and environmental cycles becomes important. For instance, a perennial species must  
432 endure multiple seasonal cycle periods per generation. An annual species' generation on the  
433 other hand fits within a single cycle period. In both cases, consequences of fitness-related  
434 phenotypes in one generation carry over to subsequent generations via intergenerational trade-  
435 offs in life histories [36], but the trajectory of evolution may differ between the two because of  
436 the number of cycle periods a generation experiences. Further, the model framework presented  
437 here assumes overlapping generations but many annual organisms have non-overlapping  
438 generations and synchronous phenologies. The evolutionary consequences of non-overlapping  
439 generations and synchronization in a population in cyclical environments should be explored  
440 further.

441         Phenology is the study of how life cycle schedules are fit to environmental cycles. A  
442 phenological trait is a manifestation of the aggregate life history strategy of a species [16], and  
443 expression timings of traits are ultimately controlled by transition rates between life history  
444 stages [20]. Phenological studies typically measure one representative phenotype such as  
445 flowering time in association with proximate drivers such as temperature or precipitation. But  
446 phenotypes covary and therefore one must consider trade-offs and competing selective forces  
447 with a whole-life perspective in order to understand the evolution of cyclical phenological traits.  
448 Here I placed such connections in the general context of environmental cycles, of which the

449 annual seasonal cycle is one example, and tested mechanistic predictions on the relatively short  
450 timescale of tide cycles which yielded large amounts of data across many cycle periods and  
451 generations quickly. This framework provides a basis for analyzing, comparing, and predicting  
452 adaptive phenological shifts in changing seasonal environments.

453

## 454 **ACKNOWLEDGEMENTS**

455 I thank G. Dwyer, M. Pascual, C.A. Pfister, T.D. Price, S.C. Stearns, and J.T. Wootton for  
456 helpful discussions and comments on an earlier draft. K. Miranda and T. Bowyer provided  
457 assistance in the field and with trait measurements. I am grateful to the Makah Tribe in Neah Bay,  
458 Friday Harbor Laboratories, and M. and D. Hurd for granting access to their lands for field data  
459 collection. This work was supported by University of Chicago Hinds Fund, DOE GAANN, and  
460 NSF LTREB grant (DEB-1556874).

461

## 462 **REFERENCES**

- 463 1. Lampert W. 1989 The Adaptive Significance of Diel Vertical Migration of Zooplankton. *Funct. Ecol.* **3**,  
464 21–27. (doi:10.2307/2389671)
- 465 2. Sponaugle S, Cowen RK. 1994 Larval durations and recruitment patterns of two Caribbean gobies  
466 (Gobiidae): contrasting early life histories in demersal spawners. *Mar. Biol.* **120**, 133–143.  
467 (doi:10.1007/BF00381949)
- 468 3. Post E, Stenseth NC. 1999 Climatic variability, plant phenology, and northern ungulates. *Ecology* **80**,  
469 1322–1339.
- 470 4. Keeley JE, Bond WJ. 1999 Mast Flowering and Semelparity in Bamboos: The Bamboo Fire Cycle  
471 Hypothesis. *Am. Nat.* **154**, 383–391. (doi:10.1086/303243)
- 472 5. Schauber EM *et al.* 2002 Masting by eighteen New Zealand plant species: the role of temperature as a  
473 synchronizing cue. *Ecology* **83**, 1214–1225.
- 474 6. Lytle DA, Poff NL. 2004 Adaptation to natural flow regimes. *Trends Ecol. Evol.* **19**, 94–100.  
475 (doi:10.1016/j.tree.2003.10.002)

- 476 7. Post E, Forchhammer MC, Stenseth NC, Callaghan TV. 2001 The timing of life–history events in a  
477 changing climate. *Proc. R. Soc. Lond. B Biol. Sci.* **268**, 15–23. (doi:10.1098/rspb.2000.1324)
- 478 8. Walther G-R, Post E, Convey P, Menzel A, Parmesan C, Beebee TJC, Fromentin J-M, Hoegh-Guldberg  
479 O, Bairlein F. 2002 Ecological responses to recent climate change. *Nature* **416**, 389–395.  
480 (doi:10.1038/416389a)
- 481 9. Parmesan C, Yohe G. 2003 A globally coherent fingerprint of climate change impacts across natural  
482 systems. *Nature* **421**, 37–42. (doi:10.1038/nature01286)
- 483 10. Edwards M, Richardson AJ. 2004 Impact of climate change on marine pelagic phenology and trophic  
484 mismatch. *Nature* **430**, 881–884. (doi:10.1038/nature02808)
- 485 11. Parmesan C. 2006 Ecological and Evolutionary Responses to Recent Climate Change. *Annu. Rev. Ecol.*  
486 *Evol. Syst.* **37**, 637–669.
- 487 12. Bradshaw WE, Holzapfel CM. 2008 Genetic response to rapid climate change: it’s seasonal timing  
488 that matters. *Mol. Ecol.* **17**, 157–166.
- 489 13. Cleland EE, Chuine I, Menzel A, Mooney HA, Schwartz MD. 2007 Shifting plant phenology in  
490 response to global change. *Trends Ecol. Evol.* **22**, 357–365. (doi:10.1016/j.tree.2007.04.003)
- 491 14. Thackeray SJ *et al.* 2010 Trophic level asynchrony in rates of phenological change for marine,  
492 freshwater and terrestrial environments. *Glob. Change Biol.* **16**, 3304–3313. (doi:10.1111/j.1365-  
493 2486.2010.02165.x)
- 494 15. Cohen JM, Lajeunesse MJ, Rohr JR. 2018 A global synthesis of animal phenological responses to  
495 climate change. *Nat. Clim. Change* **8**, 224–228. (doi:10.1038/s41558-018-0067-3)
- 496 16. Post ES, Pedersen C, Wilmers CC, Forchhammer MC. 2008 Phenological sequences reveal aggregate  
497 life history response to climatic warming. *Ecology* **89**, 363–370.
- 498 17. Both C, Van Asch M, Bijlsma RG, Van Den Burg AB, Visser ME. 2009 Climate change and unequal  
499 phenological changes across four trophic levels: constraints or adaptations? *J. Anim. Ecol.* **78**, 73–83.
- 500 18. Chuine I. 2010 Why does phenology drive species distribution? *Philos. Trans. R. Soc. Lond. B Biol. Sci.*  
501 **365**, 3149–3160. (doi:10.1098/rstb.2010.0142)
- 502 19. Richardson AD *et al.* 2010 Influence of spring and autumn phenological transitions on forest  
503 ecosystem productivity. *Philos. Trans. R. Soc. Lond. B Biol. Sci.* **365**, 3227–3246.  
504 (doi:10.1098/rstb.2010.0102)
- 505 20. Forrest J, Miller-Rushing AJ. 2010 Toward a synthetic understanding of the role of phenology in  
506 ecology and evolution. *Philos. Trans. R. Soc. Lond. B Biol. Sci.* **365**, 3101–3112.  
507 (doi:10.1098/rstb.2010.0145)
- 508 21. Visser ME, Caro SP, Oers K van, Schaper SV, Helm B. 2010 Phenology, seasonal timing and circannual  
509 rhythms: towards a unified framework. *Philos. Trans. R. Soc. B Biol. Sci.* **365**, 3113–3127.  
510 (doi:10.1098/rstb.2010.0111)

- 511 22. Lande R, Engen S, Sæther B-E. 2017 Evolution of stochastic demography with life history tradeoffs in  
512 density-dependent age-structured populations. *Proc. Natl. Acad. Sci.* **114**, 11582–11590.  
513 (doi:10.1073/pnas.1710679114)
- 514 23. Cook RE. 1979 Patterns of Juvenile Mortality and Recruitment in Plants. In *Topics in Plant Population*  
515 *Biology*, pp. 207–231. Palgrave, London.
- 516 24. Charlesworth B. 1994 *Evolution in age-structured populations*. Cambridge University Press  
517 Cambridge.
- 518 25. Caswell H. 2001 *Matrix population models: construction, analysis, and interpretation*. Sunderland,  
519 Mass.: Sinauer Associates.
- 520 26. Tuljapurkar S. 1985 Population dynamics in variable environments. VI. Cyclical environments. *Theor.*  
521 *Popul. Biol.* **28**, 1–17. (doi:10.1016/0040-5809(85)90019-X)
- 522 27. Orzack SH. 1993 Life History Evolution and Population Dynamics in Variable Environments: Some  
523 Insights from Stochastic Demography. In *Adaptation in Stochastic Environments*, pp. 63–104.  
524 Springer, Berlin, Heidelberg.
- 525 28. Caswell H, Trevisan MC. 1994 Sensitivity Analysis of Periodic Matrix Models. *Ecology* **75**, 1299–1303.  
526 (doi:10.2307/1937455)
- 527 29. Lytle DA. 2001 Disturbance Regimes and Life-History Evolution. *Am. Nat.* **157**, 525–536.  
528 (doi:10.1086/319930)
- 529 30. Tuljapurkar S, Gaillard J-M, Coulson T. 2009 From stochastic environments to life histories and back.  
530 *Philos. Trans. R. Soc. B Biol. Sci.* **364**, 1499–1509. (doi:10.1098/rstb.2009.0021)
- 531 31. Koons DN, Pavard S, Baudisch A, Metcalf JE. 2009 Is life-history buffering or lability adaptive in  
532 stochastic environments? *Oikos* **118**, 972–980.
- 533 32. Gadgil M, Bossert WH. 1970 Life historical consequences of natural selection. *Am. Nat.* **104**, 1–24.
- 534 33. Charnov EL, Schaffer WM. 1973 Life-history consequences of natural selection: Cole's result  
535 revisited. *Am. Nat.* **107**, 791–793.
- 536 34. Law R. 1979 Optimal life histories under age-specific predation. *Am. Nat.* **114**, 399–417.
- 537 35. Michod RE. 1979 Evolution of life histories in response to age-specific mortality factors. *Am. Nat.*  
538 **113**, 531–550.
- 539 36. Stearns SC. 1992 *The Evolution of Life Histories*. Oxford: Oxford University Press.
- 540 37. Roff DA. 1984 The Evolution of Life History Parameters in Teleosts. *Can. J. Fish. Aquat. Sci.* **41**, 989–  
541 1000. (doi:10.1139/f84-114)
- 542 38. Hairston NG, Walton WE. 1986 Rapid evolution of a life history trait. *Proc. Natl. Acad. Sci.* **83**, 4831–  
543 4833.



- 544 39. Reznick DN, Butler MJ, Rodd FH, Ross P. 1996 Life-history evolution in guppies (*Poecilia reticulata*) 6.  
545 Differential mortality as a mechanism for natural selection. *Evolution* **50**, 1651–1660.
- 546 40. Ernande B, Dieckmann U, Heino M. 2004 Adaptive changes in harvested populations: plasticity and  
547 evolution of age and size at maturation. *Proc. R. Soc. Lond. B Biol. Sci.* **271**, 415–423.  
548 (doi:10.1098/rspb.2003.2519)
- 549 41. Olsen EM, Heino M, Lilly GR, Morgan MJ, Brattey J, Ernande B, Dieckmann U. 2004 Maturation  
550 trends indicative of rapid evolution preceded the collapse of northern cod. *Nature* **428**, 932–935.  
551 (doi:10.1038/nature02430)
- 552 42. Walsh MR, Post DM. 2011 Interpopulation variation in a fish predator drives evolutionary  
553 divergence in prey in lakes. *Proc. R. Soc. Lond. B Biol. Sci.* **278**, 2628–2637.  
554 (doi:10.1098/rspb.2010.2634)
- 555 43. Orzack SH, Tuljapurkar S. 2001 Reproductive Effort in Variable Environments, or Environmental  
556 Variation Is for the Birds. *Ecology* **82**, 2659–2665. (doi:10.1890/0012-  
557 9658(2001)082[2659:REIVEO]2.0.CO;2)
- 558 44. Metcalf CJE, Koons DN. 2007 Environmental uncertainty, autocorrelation and the evolution of  
559 survival. *Proc. R. Soc. Lond. B Biol. Sci.* **274**, 2153–2160. (doi:10.1098/rspb.2007.0561)
- 560 45. Childs DZ, Metcalf CJE, Rees M. 2010 Evolutionary bet-hedging in the real world: empirical evidence  
561 and challenges revealed by plants. *Proc. R. Soc. Lond. B Biol. Sci.* , rspb20100707.  
562 (doi:10.1098/rspb.2010.0707)
- 563 46. Koons DN, Grand JB, Zinner B, Rockwell RF. 2005 Transient population dynamics: relations to life  
564 history and initial population state. *Ecol. Model.* **185**, 283–297.
- 565 47. Stott I, Townley S, Hodgson DJ. 2011 A framework for studying transient dynamics of population  
566 projection matrix models. *Ecol. Lett.* **14**, 959–970.
- 567 48. Skellam JG. 1967 Seasonal periodicity in theoretical population ecology. In *Proceedings of the 5th*  
568 *Berkeley symposium in mathematical statistics and probability*, pp. 179–205.
- 569 49. Stearns SC. 1989 Trade-Offs in Life-History Evolution. *Funct. Ecol.* **3**, 259–268. (doi:10.2307/2389364)
- 570 50. Pease CM, Bull JJ. 1988 A critique of methods for measuring life history trade-offs. *J. Evol. Biol.* **1**,  
571 293–303.
- 572 51. Powlik JJ. 1998 Seasonal abundance and population flux of *Tigriopus californicus* (Copepoda:  
573 Harpacticoida) in Barkley sound, British Columbia. *J. Mar. Biol. Assoc. U. K.* **78**, 467–481.
- 574 52. Powlik JJ. 1999 Habitat characters of *Tigriopus californicus* (Copepoda: Harpacticoida), with notes on  
575 the dispersal of supralittoral fauna. *J. Mar. Biol. Assoc. U. K.* **79**, 85–92.
- 576 53. Dethier MN. 1980 Tidepools as refuges: Predation and the limits of the harpacticoid copepod  
577 *Tigriopus californicus* (Baker). *J. Exp. Mar. Biol. Ecol.* **42**, 99–111. (doi:10.1016/0022-0981(80)90169-  
578 0)

- 579 54. Dybdahl MF. 1995 Selection on life-history traits across a wave exposure gradient in the tidepool  
580 copepod *Tigriopus californicus* (Baker). *J. Exp. Mar. Biol. Ecol.* **192**, 195–210. (doi:10.1016/0022-  
581 0981(95)00063-W)
- 582 55. Roff DA, Heibo E, Vøllestad LA. 2006 The importance of growth and mortality costs in the evolution  
583 of the optimal life history. *J. Evol. Biol.* **19**, 1920–1930.
- 584 56. Charnov EL, Turner TF, Winemiller KO. 2001 Reproductive constraints and the evolution of life  
585 histories with indeterminate growth. *Proc. Natl. Acad. Sci.* **98**, 9460–9464.  
586 (doi:10.1073/pnas.161294498)
- 587 57. Schluter D, Price TD, Rowe L. 1991 Conflicting selection pressures and life history trade-offs. *Proc R*  
588 *Soc Lond B* **246**, 11–17. (doi:10.1098/rspb.1991.0118)
- 589 58. Willett CS. 2010 Potential fitness trade-offs for thermal tolerance in the intertidal copepod *Tigriopus*  
590 *californicus*. *Evolution* **64**, 2521–2534.
- 591 59. Kelly MW, Grosberg RK, Sanford E. 2013 Trade-Offs, Geography, and Limits to Thermal Adaptation in  
592 a Tide Pool Copepod. *Am. Nat.* **181**, 846–854. (doi:10.1086/670336)
- 593 60. Salguero-Gómez R, Jones OR, Jongejans E, Blomberg SP, Hodgson DJ, Mbeau-Ache C, Zuidema PA,  
594 Kroon H de, Buckley YM. 2016 Fast–slow continuum and reproductive strategies structure plant life-  
595 history variation worldwide. *Proc. Natl. Acad. Sci.* **113**, 230–235. (doi:10.1073/pnas.1506215112)
- 596 61. Cohen AA, Isaksson C, Salguero-Gómez R. 2017 Co-existence of multiple trade-off currencies shapes  
597 evolutionary outcomes. *PLOS ONE* **12**, e0189124. (doi:10.1371/journal.pone.0189124)
- 598 62. Tuljapurkar SD. 1982 Population dynamics in variable environments. III. Evolutionary dynamics of r-  
599 selection. *Theor. Popul. Biol.* **21**, 141–165. (doi:10.1016/0040-5809(82)90010-7)
- 600 63. Charlesworth B. 1990 Optimization models, quantitative genetics, and mutation. *Evolution* **44**, 520–  
601 538.
- 602 64. Burton RS, Feldman MW. 1981 Population Genetics of *Tigriopus Californicus*. II. Differentiation  
603 Among Neighboring Populations. *Evolution* **35**, 1192–1205. (doi:10.2307/2408132)
- 604 65. Burton RS. 1987 Differentiation and integration of the genome in populations of the marine  
605 copepod *Tigriopus californicus*. *Evolution* **41**, 504–513.
- 606 66. Burton RS. 1997 Genetic evidence for long term persistence of marine invertebrate populations in  
607 an ephemeral environment. *Evolution* **51**, 993–998.
- 608 67. Rathcke B, Lacey EP. 1985 Phenological Patterns of Terrestrial Plants. *Annu. Rev. Ecol. Syst.* **16**, 179–  
609 214.
- 610 68. Rimmel T, Tammaru T, Maegi M. 2009 Seasonal mortality trends in tree-feeding insects: a field  
611 experiment. *Ecol. Entomol.* **34**, 98–106.

- 612 69. Keeling CD, Chin JFS, Whorf TP. 1996 Increased activity of northern vegetation inferred from  
613 atmospheric CO<sub>2</sub> measurements. *Nature* **382**, 146–149. (doi:10.1038/382146a0)
- 614 70. Angert A, Biraud S, Bonfils C, Henning CC, Buermann W, Pinzon J, Tucker CJ, Fung I. 2005 Drier  
615 summers cancel out the CO<sub>2</sub> uptake enhancement induced by warmer springs. *Proc. Natl. Acad. Sci.*  
616 **102**, 10823–10827. (doi:10.1073/pnas.0501647102)
- 617 71. Wolkovich EM *et al.* 2012 Warming experiments underpredict plant phenological responses to  
618 climate change. *Nature* **485**, 494–497. (doi:10.1038/nature11014)
